# Supplementary material
Source: PubMed Central journal article supplement (PMC6291830)
Supplement: NIHMS988399-supplement-etables.pdf [file NIHMS988399-supplement-etables.pdf]

## Supplementary Online Content

Mussman GM, Parker MW, Statile A, Sucharew H, Brady PW. Suctioning and length of stay in infants hospitalized with bronchiolitis. *JAMA Pediatr*. Published online March 4, 2013. doi:10.1001/jamapediatrics.2013.36.

eTable 1. Comorbidity Categories

eTable 2. Subanalysis: Propensity Score Weighted Model Among Patients Receiving o2 in the 1st 24 hours (n=409)

eTable 3. Subanalysis: Propensity Score Weighted Model Among Patients With No Comorbidities (n=508)

This supplementary material has been provided by the authors to give readers additional information about their work.

eTable 1. Comorbidity Categories

| <b>Comorbidity Category</b>              | <b>ICD-9-CM codes</b>                       | <b>Comments</b>                                        |
|------------------------------------------|---------------------------------------------|--------------------------------------------------------|
| Asthma                                   | 493 (all)                                   |                                                        |
| Bacterial Pneumonia                      | 481-486                                     |                                                        |
| Congenital Heart Disease                 | 745-747.9                                   |                                                        |
| Nasal and Sinus Comorbidities            | 461                                         | Acute Sinusitis                                        |
|                                          | 470                                         | Deviated nasal septum                                  |
|                                          | 471 (all)                                   | Nasal polyps of various types                          |
|                                          | 748                                         | Choanal atresia                                        |
|                                          | 748.1                                       | Other nose abnormality (e.g. absent nose)              |
|                                          | 754                                         | Congenital deviated septum                             |
| Chronic Lower Respiratory Tract Disease  | 748.4-748.9                                 | e.g. Cystic lung diseases, bronchiectasis              |
|                                          | 770.7                                       | Broncho-pulmonary dysplasia (BPD)                      |
| Diseases of pharynx, larynx, and trachea | 462-465                                     | e.g. Acute pharyngitis, tonsillitis                    |
|                                          | 472-476                                     | e.g. Chronic tonsillitis, peritonsillar abscess        |
|                                          | 478.2                                       | Disease of Pharynx NOS                                 |
|                                          | 478.3                                       | Vocal cord paralysis                                   |
|                                          | 478.4                                       | Vocal cord polyp                                       |
|                                          | 478.5                                       | Abscess/cellulitis of vocal cord                       |
|                                          | 478.6                                       | Laryngeal edema                                        |
|                                          | 478.7                                       | Disease of larynx NOS                                  |
|                                          | 478.8                                       | Upper respiratory tract hypersensitivity reaction, NOS |
|                                          | 478.9                                       | Tracheal abscess                                       |
|                                          | 748.2                                       | Laryngeal Web                                          |
| 748.3                                    | Other larynx/trachea congenital abnormality |                                                        |
| Muscular Dystrophy                       | 335 (all)                                   | Motor neuron diseases                                  |
|                                          | 356 (all)                                   | Hereditary and idiopathic peripheral neuropathy        |
|                                          | 359 (all)                                   | Muscular dystrophies and other myopathies              |

eTable 2. Subanalysis: Propensity Score Weighted Model Among Patients Receiving o2 in the 1<sup>st</sup> 24 hours (n=409)

| Exposures                                      | Coefficient (SE) | Length of Stay (days)<br>Geometric Mean (95% CI) | P Value |
|------------------------------------------------|------------------|--------------------------------------------------|---------|
| <b>Invasive Device Percentage</b>              |                  |                                                  | <0.001  |
| None                                           | -0.421 (0.079)   | 1.83 (1.57, 2.13)                                |         |
| >0 to 35%                                      | -0.204 (0.073)   | 2.27 (1.97, 2.62)                                |         |
| >35 to 60%                                     | -0.190 (0.076)   | 2.30 (1.98, 2.68)                                |         |
| >60 %                                          | Reference        | 2.78 (2.41, 3.21)                                |         |
| <b>Suctioning Lapses</b>                       |                  |                                                  | <0.001  |
| None                                           | -0.531 (0.102)   | 1.75 (1.47, 2.08)                                |         |
| 1                                              | -0.367 (0.091)   | 2.06 (1.81, 2.35)                                |         |
| 2                                              | -0.182 (0.090)   | 2.48 (2.17, 2.83)                                |         |
| 3 or 4                                         | Reference        | 2.98 (2.49, 3.56)                                |         |
| <b>Covariates</b>                              |                  |                                                  |         |
| <b>Sex</b>                                     |                  |                                                  | 0.04    |
| Female                                         | 0.110 (0.054)    | 2.40 (2.10, 2.75)                                |         |
| Male                                           | Reference        | 2.15 (1.88, 2.45)                                |         |
| <b>Age (mos)</b>                               | -0.046 (0.099)   | -                                                | <0.001  |
| <b>Medicaid</b>                                |                  |                                                  | 0.43    |
| Yes                                            | 0.045 (0.058)    | 2.32 (2.07, 2.61)                                |         |
| No                                             | Reference        | 2.22 (1.93, 2.55)                                |         |
| <b>Department</b>                              |                  |                                                  | 0.004   |
| Academic Unit B                                | -0.122 (0.089)   | 2.36 (2.04, 2.74)                                |         |
| Academic Unit A                                | -0.247 (0.081)   | 2.08 (1.83, 2.37)                                |         |
| Satellite Unit                                 | -0.277 (0.092)   | 2.02 (1.74, 2.35)                                |         |
| Other Academic                                 | Reference        | 2.67 (2.25, 3.17)                                |         |
| <b>Days ill prior to admission</b>             |                  |                                                  | 0.18    |
| <2                                             | 0.002 (0.143)    | 2.29 (1.72, 3.04)                                |         |
| 2 to <3                                        | 0.094 (0.070)    | 2.51 (2.22, 2.83)                                |         |
| 3 to <4                                        | -0.007 (0.076)   | 2.26 (1.96, 2.61)                                |         |
| 4 to <5                                        | -0.111 (0.085)   | 2.04 (1.74, 2.39)                                |         |
| ≥ 5                                            | Reference        | 2.28 (1.99,2.61)                                 |         |
| <b>IV fluid bolus</b>                          |                  |                                                  | 0.34    |
| < 20 cc/kg or no infusion                      | -0.089 (0.094)   | 2.17 (2.00, 2.36)                                |         |
| ≥ 20 cc/kg                                     | Reference        | 2.37 (1.96, 2.88)                                |         |
| <b>Temperature &gt; 38 within 1st 24 hours</b> |                  |                                                  | 0.04    |
| Yes                                            | 0.114 (0.055)    | 2.40 (2.13, 2.71)                                |         |
| No                                             | Reference        | 2.15 (1.88, 2.45)                                |         |
| <b>Albuterol</b>                               |                  |                                                  |         |
| None                                           | -0.010 (0.071)   | 2.37 (2.09, 2.70)                                |         |
| 1 dose                                         | -0.152 (0.70)    | 2.06 (1.79, 2.37)                                |         |
| ≥ 2 dose                                       | Reference        | 2.40 (2.07, 2.78)                                |         |
| <b>Total No. of suctioning events</b>          | 0.045 (0.011)    | -                                                | <0.001  |

R<sup>2</sup> = 0.37

eTable 3. Subanalysis: Propensity Score Weighted Model Among Patients With No Comorbidities (n=508)

| Exposures                                             | Coefficient (SE) | Length of Stay (days)<br>Geometric Mean (95% CI) | P Value |
|-------------------------------------------------------|------------------|--------------------------------------------------|---------|
| <b>Invasive Device Percentage</b>                     |                  |                                                  | <0.001  |
| None                                                  | -0.263 (0.067)   | 1.77 (1.56, 2.02)                                |         |
| >0 to 35%                                             | -0.214 (0.061)   | 1.86 (1.65, 2.11)                                |         |
| >35 to 60%                                            | -0.200 (0.063)   | 1.89 (1.67, 2.14)                                |         |
| >60 %                                                 | Reference        | 2.31 (2.05, 2.60)                                |         |
| <b>Suctioning Lapses</b>                              |                  |                                                  | <0.001  |
| None                                                  | -0.533 (0.088)   | 1.57 (1.37, 1.79)                                |         |
| 1                                                     | -0.457 (0.077)   | 1.69 (1.52, 1.89)                                |         |
| 2                                                     | -0.271 (0.078)   | 2.04 (1.82, 2.28)                                |         |
| 3 or 4                                                | Reference        | 2.67 (2.28, 3.12)                                |         |
| <b>Covariates</b>                                     |                  |                                                  |         |
| <b>Sex</b>                                            |                  |                                                  | 0.97    |
| Female                                                | 0.002 (0.048)    | 1.95 (1.74, 2.18)                                |         |
| Male                                                  | Reference        | 1.95 (1.76, 2.15)                                |         |
| <b>Age (mos)</b>                                      | -0.034 (0.009)   | -                                                |         |
| <b>Medicaid</b>                                       |                  |                                                  | 0.28    |
| Yes                                                   | 0.053 (0.049)    | 2.00 (1.81, 2.21)                                |         |
| No                                                    | Reference        | 1.90 (1.69, 2.13)                                |         |
| <b>Department</b>                                     |                  |                                                  |         |
| Academic Unit B                                       | -0.082 (0.074)   | 1.97 (1.75, 2.23)                                |         |
| Academic Unit A                                       | -0.125 (0.069)   | 1.89 (1.70, 2.10)                                |         |
| Satellite Unit                                        | -0.168 (0.084)   | 1.81 (1.57, 2.08)                                |         |
| Other Academic                                        | Reference        | 2.14 (1.85, 2.47)                                |         |
| <b>Days ill prior to admission</b>                    |                  |                                                  | 0.86    |
| <2                                                    | 0.034 (0.100)    | 2.06 (1.70, 2.49)                                |         |
| 2 to <3                                               | -0.027 (0.059)   | 1.93 (1.72, 2.17)                                |         |
| 3 to <4                                               | -0.055 (0.065)   | 1.88 (1.66, 2.14)                                |         |
| 4 to <5                                               | -0.050 (0.071)   | 1.89 (1.64, 2.18)                                |         |
| ≥ 5                                                   | Reference        | 1.99 (1.77, 2.23)                                |         |
| <b>IV fluid bolus</b>                                 |                  |                                                  | 0.84    |
| < 20 cc/kg or no infusion                             | -0.017 (0.083)   | 1.93 (1.81, 2.07)                                |         |
| ≥ 20 cc/kg                                            | Reference        | 1.97 (1.67, 2.31)                                |         |
| <b>Any O2 within 1st 24 hours</b>                     |                  |                                                  | <0.001  |
| Yes                                                   | 0.244 (0.048)    | 2.20 (1.99, 2.43)                                |         |
| No                                                    | Reference        | 1.72 (1.54, 1.93)                                |         |
| <b>Temperature &gt; 38 in 1<sup>st</sup> 24 hours</b> |                  |                                                  | 0.22    |
| Yes                                                   | 0.057 (0.047)    | 2.01 (1.81, 2.23)                                |         |
| No                                                    | Reference        | 1.89 (1.70, 2.11)                                |         |
| <b>Albuterol</b>                                      |                  |                                                  | 0.07    |
| None                                                  | -0.138 (0.070)   | 1.87 (1.69, 2.07)                                |         |
| 1 dose                                                | -0.157 (0.069)   | 1.84 (1.65, 2.05)                                |         |
| ≥ 2 dose                                              | Reference        | 2.15 (1.86, 2.48)                                |         |
| <b>Total No. suctioning events</b>                    | 0.080 (0.009)    | -                                                | <0.001  |
